# Supplementary material for: RETRACTED: The Presence of Acinetobacter baumannii DNA on the Skin of Homeless People and Its Relationship With Body Lice Infestation. Preliminary Results
Source: PubMed Central journal article supplement (PMC6460902; doi:10.3389/fcimb.2019.00086), 2019-04-05
Supplement: Data_Sheet_1.pdf [file Data_Sheet_1.pdf]

## Supplementary Material

### Technical Appendix

*Acinetobacter baumannii*-specific gene encoding for Type VI secretion system OmpA/MotB (accession number CP019034.1, GenBank) was chosen *in silico* for the experimental design. Sequence similarity searching is provided by the BLAST (<http://www.ncbi.nlm.nih.gov/>) and all sequences ( $\geq 85\%$  identity score with reference sequence): *A. baumannii* (CP026943.1, LT594095.1, CP022283.1, CP020598.1, CP006768.1, CP015121.1, CP027183.1, CP021345.1, CP026711.1, CP026761.1, CP009256.1, CP026125.1, CP018332.1), *A. calcoaceticus* (LT605059, APQJ01000008, CP020000), *A. nosocomialis* (CP010368, CP020588, CP014019) were downloaded from the Taxonomy server of GenBank (Benson et al., 2000) and aligned using the Bioedit 7.0.5 software ([www.http://bioedit.software.informer.com](http://www.bioedit.com)). Based on comprehensive analysis and alignment of each gene type, primers and probes (Supplementary Table 2) were designed and verified again *in silico* by conducting a BLAST search in GenBank.

The specificity of the system was determined *in vitro* using a panel of DNA extracted from the following organisms available in our institute (<https://www.mediterranee-infection.com/diagnostic/les-centres-nationaux-de-reference-cnr/cnr-rickettsioses/collection-de-souches/>): 14 *A. baumannii* strains, 12 *Acinetobacter spp.* strains different from *A. baumannii*; 30 organisms others than *Acinetobacter spp.* (Supplementary Table 3 and Supplementary Figure 1). The specificity of *A. baumannii* qPCR was 100% among the species tested: 14/14 *A. baumannii* strains were positive; meanwhile 42/42 organisms different from *A. baumannii* (including genetically related *A. nosocomialis* and *A. calcoaceticus*) tested negative. In order to test the sensitivity of the method, a serial 8-fold dilutions for each of the 14 *A. baumannii* strains were performed; the result was confirmed as shown, for example, in Supplementary Figure 2.

### References

Benson, D.A., Karsch-Mizrachi, I., Lipman, D.J., Ostell, J., Rapp, B.A., and Wheeler, D.L. (2000). GenBank. *Nucleic. Acids. Res.* 28, 15-18.

Collection de souches. Méditerranée Infection. (<https://www.mediterranee-infection.com/diagnostic/les-centres-nationaux-de-reference-cnr/cnr-rickettsioses/collection-de-souches/>)

**Supplementary table 1.** Lice-sampling strategy

| Number of lice collected from homeless subjects (N, min-max per individual) | Theoretical percentage of lice tested among lice collected | Lice tested/Lice collected (N) |
|-----------------------------------------------------------------------------|------------------------------------------------------------|--------------------------------|
| 1-10                                                                        | 100%                                                       | 24/24                          |
| 11-50                                                                       | 50%                                                        | 39/80                          |
| 51-100                                                                      | 30%                                                        | 86/293                         |
| 101-250                                                                     | 15%                                                        | 24/160                         |
| 251-500                                                                     | 7.50%                                                      | 0                              |
| 501-1000                                                                    | 3.75%                                                      | 46/1223                        |
| Total                                                                       |                                                            | 219/1780                       |

**Supplementary table 2.** List of organisms used in this study

| <i>Genomic species</i>                        | <i>No. clinical isolates</i> | <i>STRAIN</i>       | <i>GenBank access numbers</i> | <i>Origin</i> | <i>Type of sample</i>    |
|-----------------------------------------------|------------------------------|---------------------|-------------------------------|---------------|--------------------------|
| <b>A. The genus <i>Acinetobacter</i> spp.</b> |                              |                     |                               |               |                          |
| <i>Acinetobacter baumannii</i>                | CSURP1574                    |                     |                               | Human         | Feces                    |
| <i>Acinetobacter baumannii</i>                | CSURP1875                    |                     |                               | Human         | Unknown                  |
| <i>Acinetobacter baumannii</i>                | CSURP1887                    |                     |                               | Human         | Unknown                  |
| <i>Acinetobacter baumannii</i>                | CSURP1888                    |                     |                               | Human         | Unknown                  |
| <i>Acinetobacter baumannii</i>                | CSURP1889                    |                     |                               | Human         | Unknown                  |
| <i>Acinetobacter baumannii</i>                | CSURP1891                    |                     |                               | Human         | Unknown                  |
| <i>Acinetobacter baumannii</i>                | CSURP24                      | AYE                 | CU459141.1                    | Human         | Blood                    |
| <i>Acinetobacter baumannii</i>                | CSURP25                      | SDF                 | CU468230.2                    | Animal        | <i>Pediculus humanus</i> |
| <i>Acinetobacter baumannii</i>                | CSURP266                     |                     |                               | Human         | ND                       |
| <i>Acinetobacter baumannii</i>                | CSURP270                     | <i>ABIsac-ColiR</i> | NZ_CAKB00000000.1             | Human         |                          |
| <i>Acinetobacter baumannii</i>                | CSURP271                     | <i>ABIsac-ColiS</i> | NZ_CAKA00000000.1             | Human         |                          |
| <i>Acinetobacter baumannii</i>                | CSURP2941                    |                     |                               | Environment   | Permafrost               |
| <i>Acinetobacter baumannii</i>                | CSURP414                     |                     |                               | Human         | Pus                      |
| <i>Acinetobacter baumannii</i>                | CSURP981                     |                     |                               | Human         | Sputum                   |
| <i>Acinetobacter calcoaceticus</i>            | CSURP4654                    |                     |                               | Human         | Unknown                  |
| <i>Acinetobacter bereziniae</i>               | CSURP2349                    |                     |                               | Human         | Skin                     |
| <i>Acinetobacter genospecies</i>              | CSURP367                     |                     |                               | Human         | Blood                    |
| <i>Acinetobacter johnsonii</i>                | CSURP3183                    |                     |                               | Human         | Blood                    |
| <i>Acinetobacter Iwoffii</i>                  | CSURP308                     |                     |                               | Human         | Feces                    |
| <i>Acinetobacter Iwoffii</i>                  | CSURP3143                    |                     |                               | Human         | Urine                    |
| <i>Acinetobacter Iwoffii</i>                  | CSURP786                     |                     |                               | Human         | Feces                    |
| <i>Acinetobacter nosocomialis</i>             | CSURP2568                    |                     |                               | Human         | ND                       |
| <i>Acinetobacter pittii</i>                   | CSURP610                     |                     |                               | Human         | Feces                    |
| <i>Acinetobacter schindleri</i>               | CSURP1134                    |                     |                               | Human         | Feces                    |
| <i>Acinetobacter ursingii</i>                 | CSURP3381                    |                     |                               | Environment   | Permafrost               |
| <i>Acinetobacter variabilis</i>               | CSURP2356                    |                     |                               | Human         | Skin                     |
| <b>B. Other bacteria</b>                      |                              |                     |                               |               |                          |
| <i>Anaplasma phagocytophilum</i>              |                              |                     |                               | Animal        | Tick                     |
| <i>Bartonella quintana</i>                    | CSURB177                     |                     |                               | Animal        | <i>Pediculus</i>         |

|                                     |           |           |        |                                    |
|-------------------------------------|-----------|-----------|--------|------------------------------------|
|                                     |           |           |        | <i>humanus</i>                     |
| <i>Borrelia recurrentis</i>         | CSURP2    |           | Animal | <i>humanus</i><br><i>Pediculus</i> |
|                                     |           |           |        | <i>humanus</i>                     |
|                                     |           |           |        | <i>humanus</i>                     |
| <i>Coxiella burnetii</i>            | CSURC1    |           | Human  | ND                                 |
| <i>Enterobacter aerogenes</i>       | CSURP210  |           | Human  | Blood                              |
| <i>Enterococcus faecium</i>         | CSURP306  |           | Human  | Blood                              |
| <i>Gardnerella vaginalis</i>        | CSURP3048 |           |        |                                    |
| <i>Haemophilus influenzae</i>       | CSURP750  |           | Human  | Blood                              |
| <i>Lactobacillus gasseri</i>        |           |           |        |                                    |
| <i>Rickettsia conorii</i>           | CSURR118  |           | Human  | Skin                               |
| <i>Rickettsia felis</i>             | CSURR21   | NR_074483 | Animal | Flea                               |
| <i>Rickettsia massiliae</i>         | CSURR131  |           | Animal | Tick                               |
| <i>Rickettsia typhi</i>             | CSURR162  |           | Animal | Flea                               |
| <i>Rickettsia raoultii</i>          | CSURR3    |           | Animal | Tick                               |
| <i>Salmonella spp.</i>              | CSURP404  |           | Human  | Blood                              |
| <i>Staphylococcus aureus</i>        | CSURP566  |           | Human  | Blood                              |
| <i>Staphylococcus haemolyticus</i>  | CSURP295  |           | Human  | Blood                              |
| <i>Stenotrophomonas maltophilia</i> | CSURP1214 |           | Human  | Blood                              |
| <i>Staphylococcus hominis</i>       | CSURP2339 |           | Human  | Blood                              |
| <i>Streptococcus agalactiae</i>     | CSURP679  |           | Human  | Blood                              |
| <i>Streptococcus pyogenes</i>       | CSURP739  |           | Human  | Blood                              |
| <i>Streptococcus pneumoniae</i>     | CSURP1177 |           | Human  | Blood                              |
| <i>Yersinia pestis</i>              | CSURP100  |           | Rodent | ND                                 |
| <i>Ehrlichia spp.</i>               |           |           |        |                                    |
| <i>Wolbachia spp.</i>               |           |           |        |                                    |
| <b>C. Parasites</b>                 |           |           |        |                                    |
| <i>Ctenocephalides felis</i>        |           |           |        |                                    |
| <i>Babesia canis</i>                |           |           |        |                                    |
| <b>D. Mammal animals</b>            |           |           |        |                                    |
| <i>Canis lupus familiaris</i>       |           |           | Dog    | Blood                              |
| <i>Equus ferus caballus</i>         |           |           | Horse  | Blood                              |
| <i>Homo sapiens</i>                 |           |           | Human  | Blood                              |

**Supplementary table 3.** Sequences of primers and probes used for real-time PCR in this study

| Target                         |         | Name      | Primers (5'-3') and probes      | Amplicon size |
|--------------------------------|---------|-----------|---------------------------------|---------------|
| <i>Acinetobacter baumannii</i> | Forward |           | TCAACATCACAATCTTTAGTAGCTGA      | 215 pb        |
|                                | Reward  | ompA/motB | CGCTCTTGCCAGCATAAAGA            |               |
|                                | Probe   |           | 6FAM-AAGTCGCCAAGAAACCTTGA-TAMRA |               |

**Supplementary table 4.** Detail of distribution of the number of lice collected, number of lice analysed, number of crushed lice positive to *A. baumannii* DNA and *A. baumannii* DNA skin-carriage from sheltered homeless persons of Marseille

| Year of study | ID code homeless persons | Number of lice collected | Number of lice analysed | Number of lice-washing liquid of lice positive for <i>A. baumannii</i><br>N (%) | Number of crushed lice positive for <i>A. baumannii</i><br>N (%) | <i>A. baumannii</i> on the skin |
|---------------|--------------------------|--------------------------|-------------------------|---------------------------------------------------------------------------------|------------------------------------------------------------------|---------------------------------|
| 2 013         | N°1                      | 560                      | 21                      | 4 (19)                                                                          | 6 (28.6)                                                         | Yes                             |
| 2 013         | N°2                      | 90                       | 25                      | 0 (0)                                                                           | 0 (0)                                                            | No                              |
| 2 013         | N°3                      | 663                      | 25                      | 13 (52)                                                                         | 14 (56)                                                          | No                              |
| 2 013         | N°4                      | 6                        | 6                       | 1 (16.7)                                                                        | 1 (16.7)                                                         | No                              |
| 2 013         | N°5                      | 17                       | 8                       | 5 (62.5)                                                                        | 6 (75)                                                           | No                              |
| 2 013         | N°6                      | 70                       | 21                      | 0 (0)                                                                           | 0 (0)                                                            | No                              |
| 2 013         | N°7                      | 2                        | 2                       | 0 (0)                                                                           | 0 (0)                                                            | No                              |
| 2 013         | N°8                      | 10                       | 10                      | 0 (0)                                                                           | 0 (0)                                                            | No                              |
| 2 013         | N°9                      | 80                       | 24                      | 0 (0)                                                                           | 0 (0)                                                            | No                              |
| 2 013         | N°10                     | 12                       | 6                       | 0 (0)                                                                           | 0 (0)                                                            | Yes                             |
| 2 013         | N°11                     | 19                       | 9                       | 3 (33.3)                                                                        | 6 (66.7)                                                         | No                              |
| 2 014         | N°12                     | 6                        | 6                       | 0 (0)                                                                           | 1 (16.7)                                                         | No                              |
| 2 014         | N°13                     | 32                       | 16                      | 1 (6.25)                                                                        | 3 (18.8)                                                         | Yes                             |
| 2 014         | N°14                     | 53                       | 16                      | 7 (43.8)                                                                        | 10 (62.5)                                                        | Yes                             |
| 2 014         | N°15                     | 160                      | 24                      | 6 (25)                                                                          | 12 (50)                                                          | Yes                             |
| Total         | 15 individuals           | 1780                     | 219                     | 40 (18.3)                                                                       | 59 (26.9)                                                        |                                 |

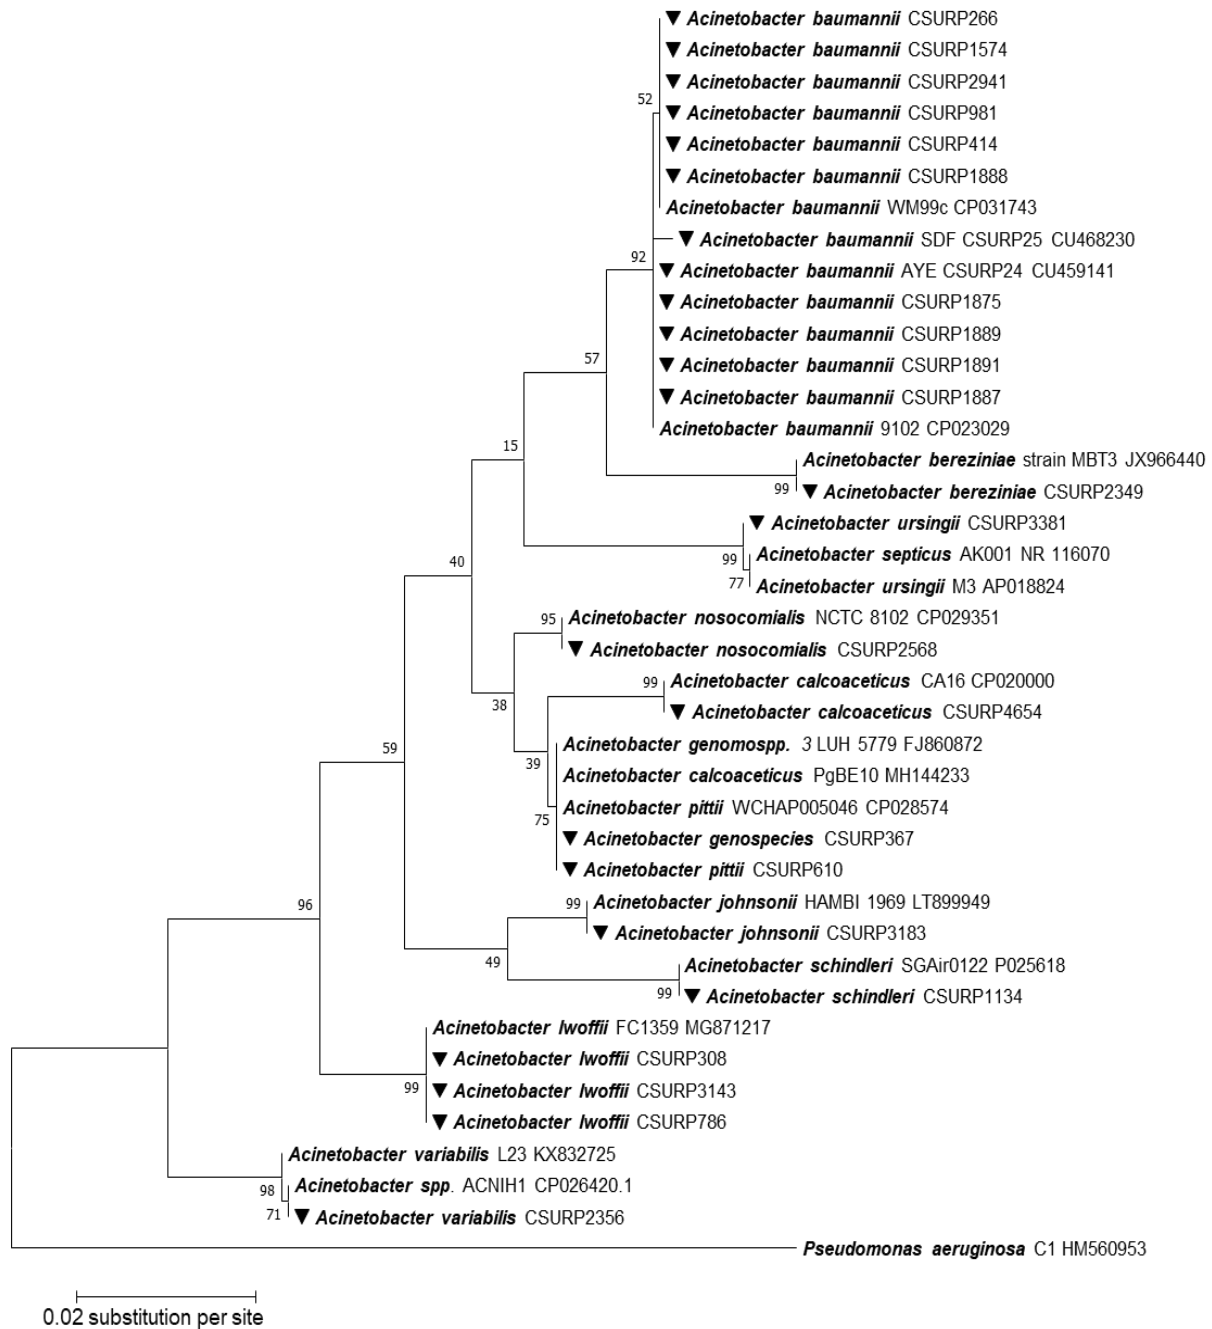

**Supplementary Figure 1.** Maximum-likelihood phylogenetic tree highlighting the position of the *Acinetobacter spp.* strains used for test sensitivity and specificity of the new system in the present study compared to another *Acinetobacter* available in the GenBank database and based on partial 16S rRNA gene sequences (data not shown), with *Pseudomonas aeruginosa* C1 (HM560953) used as outgroups. Identification of 16S rRNA gene sequences of each strain was carried out as previously described (1).

(1) Drancourt M, Berger P, Raoult D. Systematic 16S rRNA Gene Sequencing of Atypical Clinical Isolates Identified 27 New Bacterial Species Associated with Humans. *J Clin Microbiol* **2004**; 42:2197–2202.



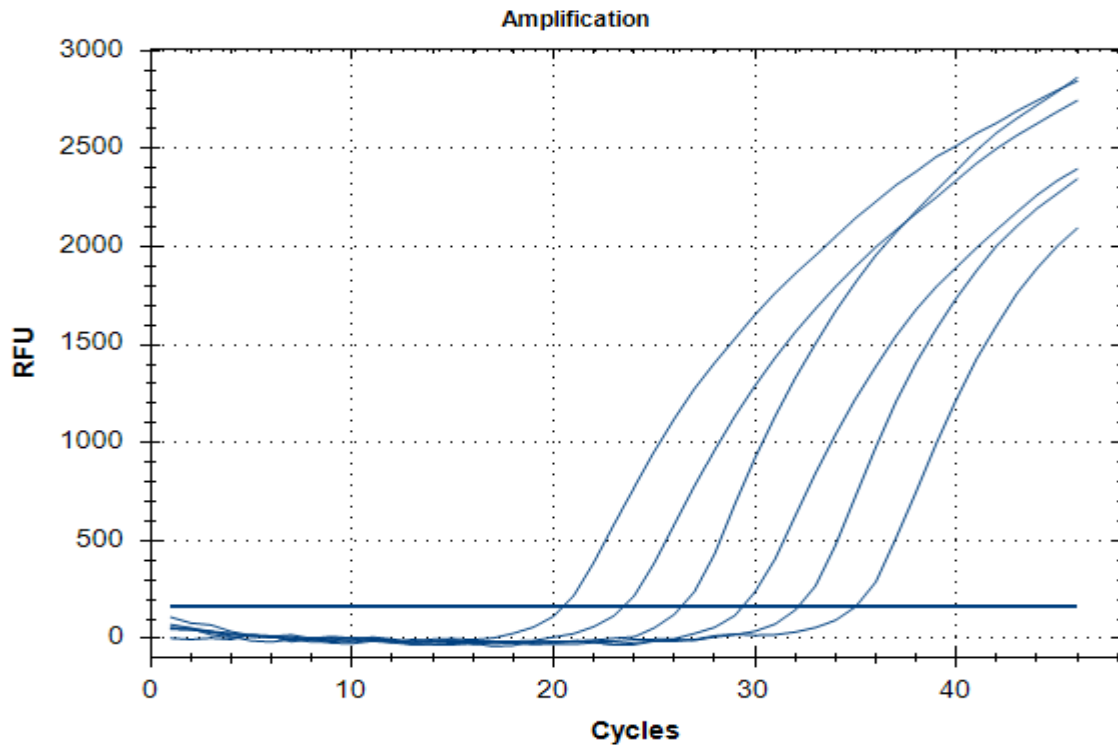

**Supplementary Figure 2.** The sensitivity of the real-time PCR assay tested on 8-fold serial dilutions of *A. baumannii* DNA strain SDF
